# Supplementary material for: Rational design for enhanced mechanical and kinetic properties of SnSb-based yolk–shell heterostructure as long cycle-life, high-rate Na-ion battery anode
Source: Royal Society of Chemistry journal article supplement (doi:10.1039/d4ta08119f), 2025-01-01
Supplement: d4ta08119f1.pdf [file d4ta08119f1.pdf]

## Supplementary Information

### **Rational Design for Enhanced Mechanical and Kinetic Properties of SnSb-based Yolk-Shell Heterostructure as Long Cycle-Life, High-Rate Na-Ion Battery Anode**

*Jong Min Im, ‡<sup>ab</sup> Hyojun Lim, ‡<sup>ac</sup> Hyunjin Kim,<sup>ad</sup> Yun Chan Kang,<sup>b</sup> Yoon Hwa<sup>e</sup> and Sang-Ok Kim<sup>\*ad</sup>*

<sup>a</sup> Energy Storage Research Center, Korea Institute of Science and Technology, 5, Hwarang-ro 14-gil, Seongbuk-gu, Seoul 02792, Republic of Korea

<sup>b</sup> Department of Materials Science and Engineering, Korea University, 145 Anam-ro, Seongbuk-gu, Seoul 02841, Republic of Korea

<sup>c</sup> Department of Nuclear Science and Engineering and Department of Materials Science and Engineering, Massachusetts Institute of Technology, Cambridge, MA 02139, United States

<sup>d</sup> Division of Energy & Environment Technology, KIST School, Korea University of Science and Technology, 5, Hwarang-ro 14-gil, Seongbuk-gu, Seoul 02792, Republic of Korea

<sup>e</sup> School of Electrical, Computer and Energy Engineering, Arizona State University, Tempe, Arizona 85287, United States

\* Corresponding Author. Email: [kimsok82@kist.re.kr](mailto:kimsok82@kist.re.kr)

‡ These authors contributed equally to this work.

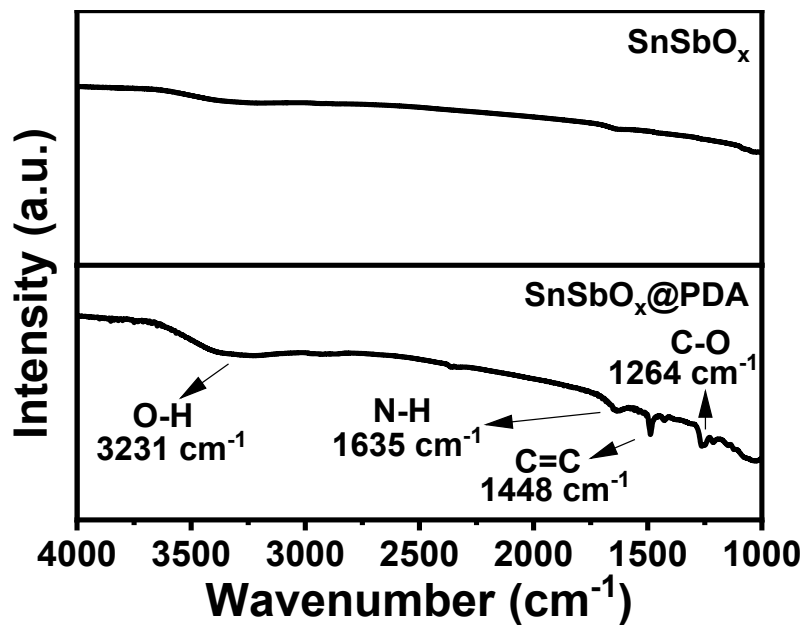

**Figure S1.** FT-IR spectra of the SnSbO<sub>x</sub> and SnSbO<sub>x</sub>@PDA precursors.

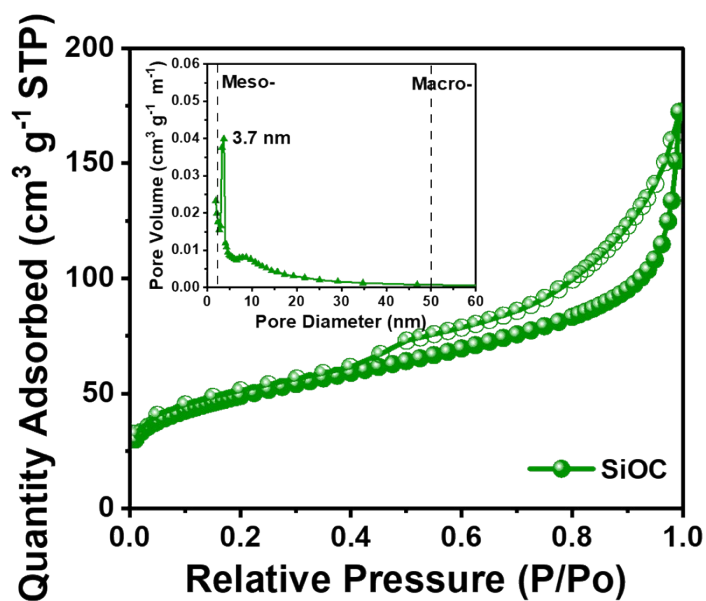

**Figure S2.** Nitrogen adsorption–desorption isotherm and pore size distribution (inset) of SiOC. (BET surface area and total pore volume of SiOC were measured to be 175.3 m<sup>2</sup> g<sup>-1</sup> and 0.270 cm<sup>3</sup> g<sup>-1</sup>, respectively.)

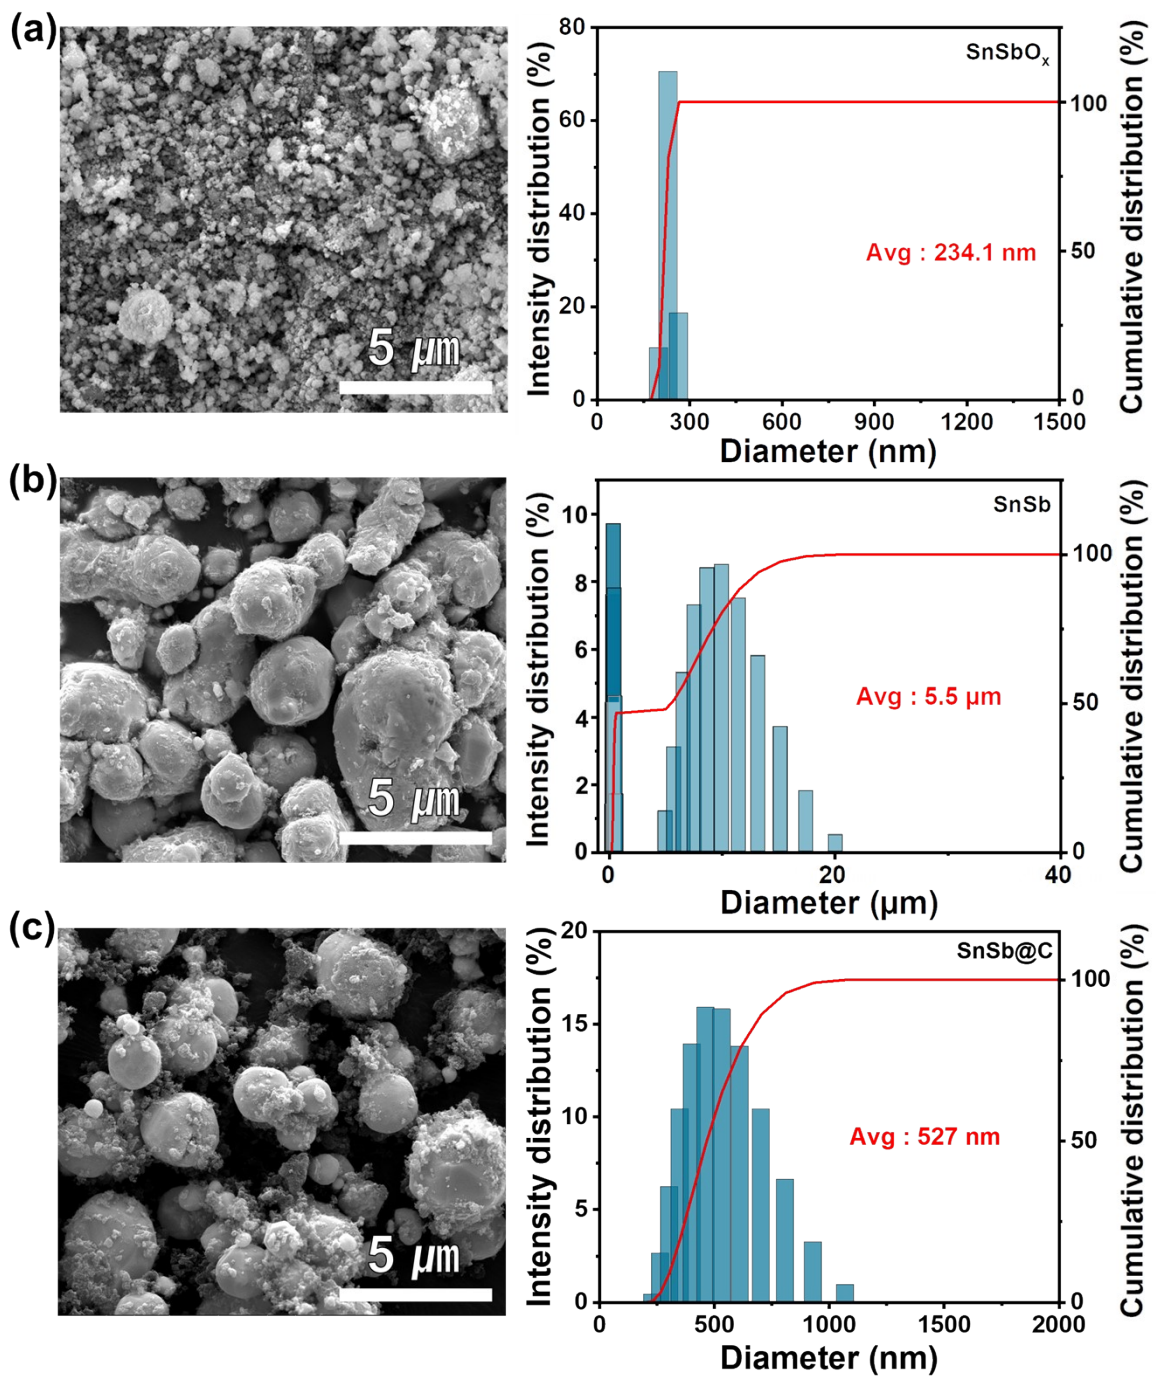

**Figure S3.** FE-SEM images and DLS particle distribution of (a) SnSbO<sub>x</sub>, (b) SnSb, and (c) SnSb@C.

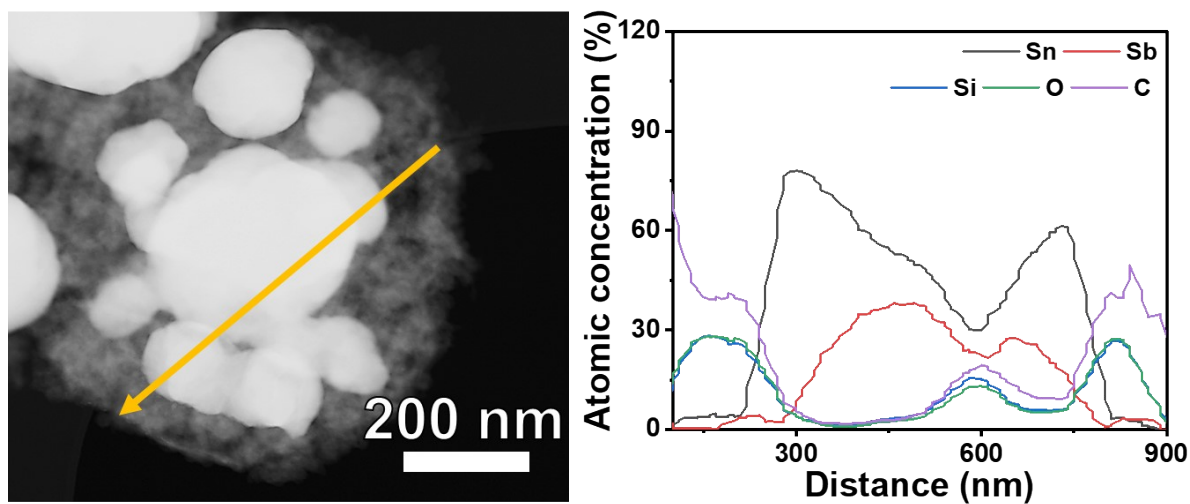

Figure S4. EDS line-scan profile of the SnSb@C-SiOC nano hybrid particle.

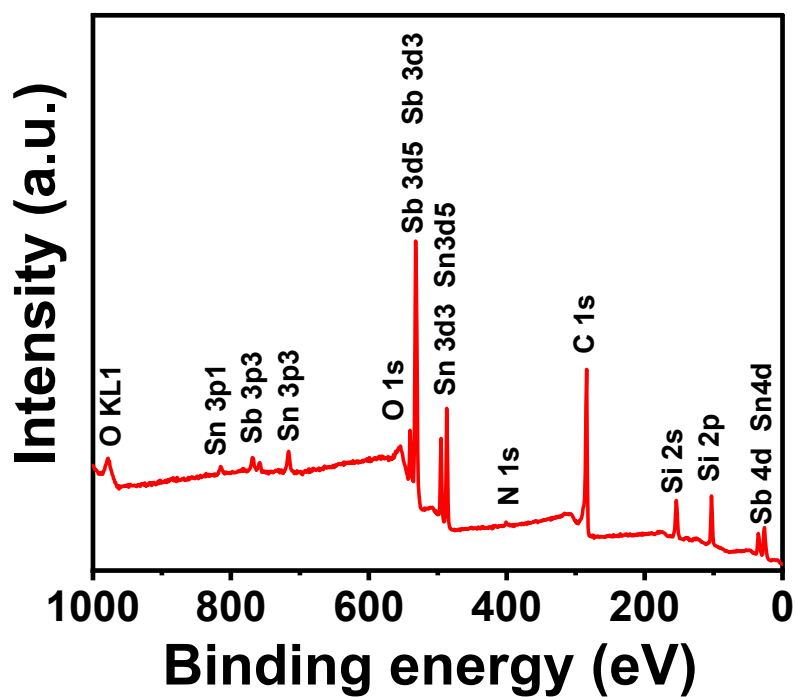

Figure S5. XPS survey spectrum of SnSb@C-SiOC.

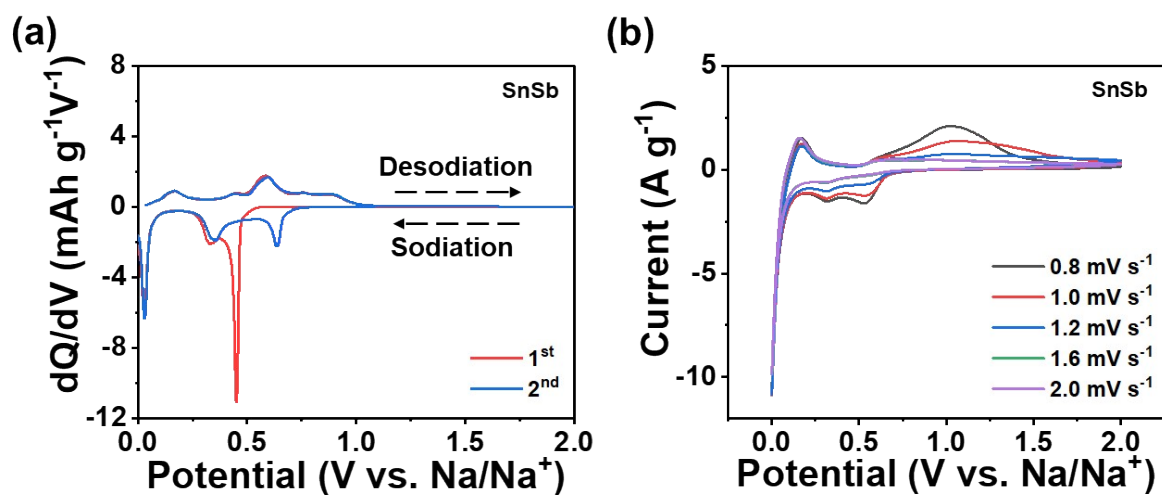

**Figure S6.** (a)  $dQ/dV$  plots of SnSb at  $0.1 \text{ Ag}^{-1}$  for the 1<sup>st</sup> and 2<sup>nd</sup> cycles. (b) CV curves of the SnSb electrode at different scan rates from 0.8 to 2.0  $mV s^{-1}$  in a voltage range of 0.001–2.0 V.

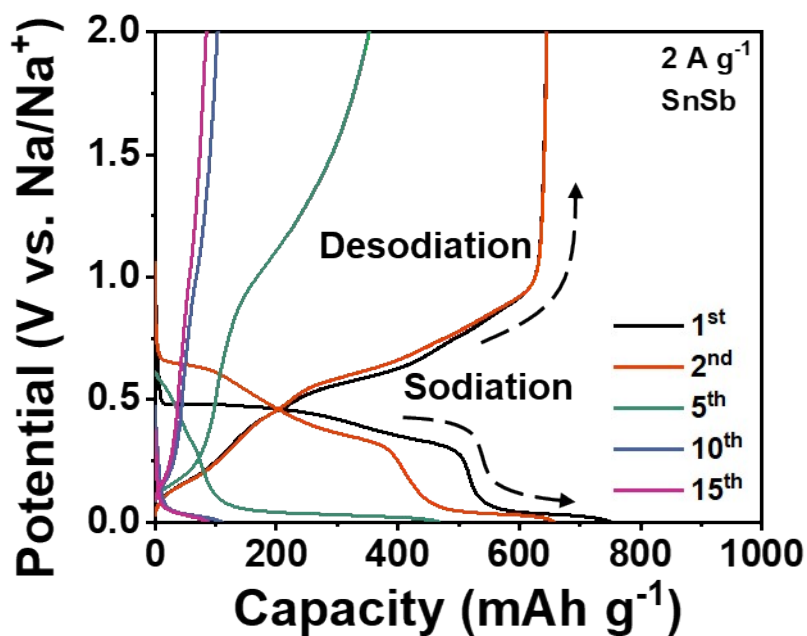

**Figure S7.** GCD profiles of the SnSb cell at several number of cycles (1<sup>st</sup>, 2<sup>nd</sup>, 5<sup>th</sup>, 10<sup>th</sup>, and 15<sup>th</sup>).

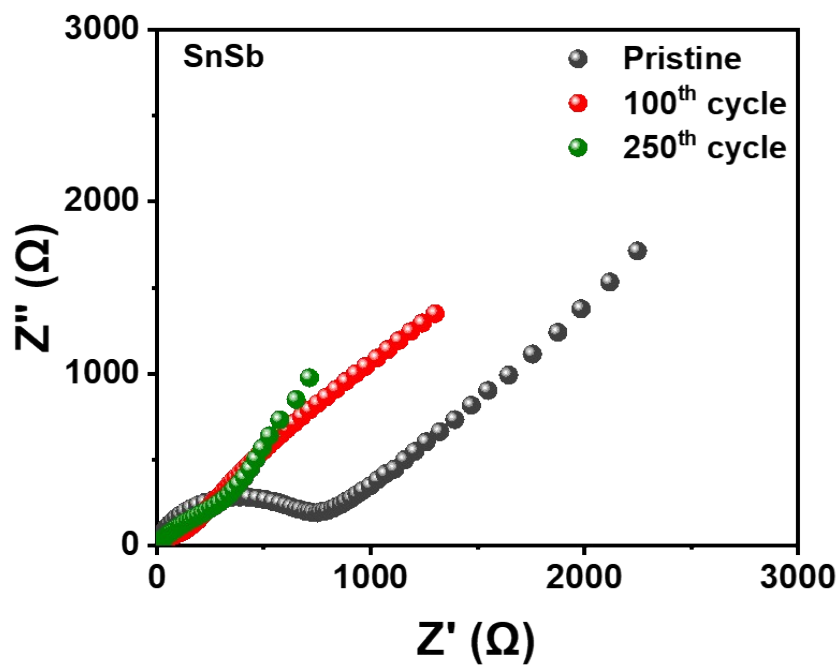

Figure S8. Nyquist plot of the SnSb electrode before and after the 100<sup>th</sup> and 250<sup>th</sup> cycles.

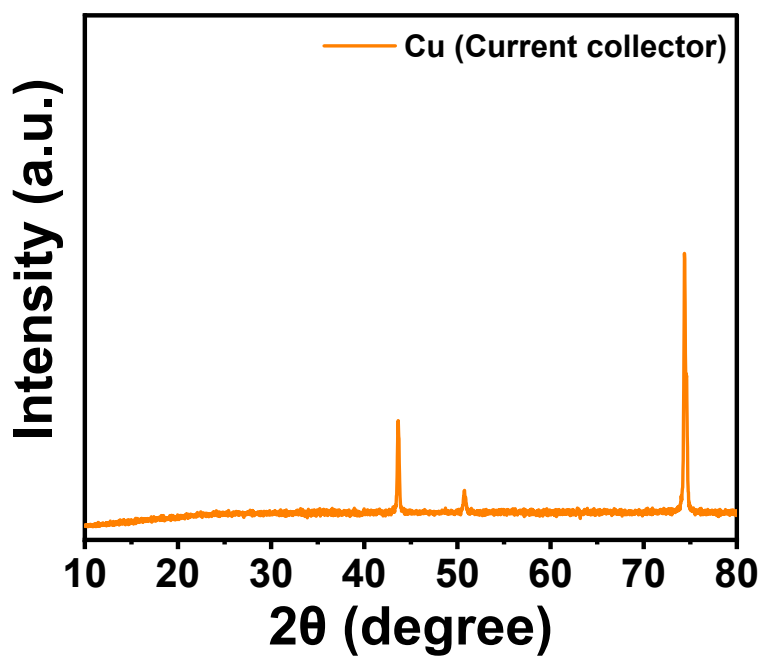

Figure S9. XRD pattern of the Cu current collector.

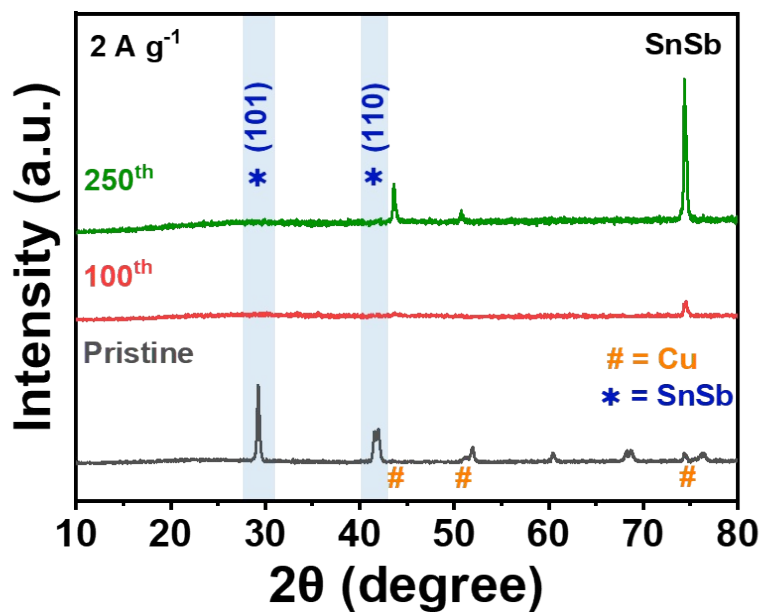

**Figure S10.** *Ex-situ* XRD patterns of the SnSb electrode before and after cycling (100<sup>th</sup> and 250<sup>th</sup>) at 2.0 A g<sup>-1</sup>.

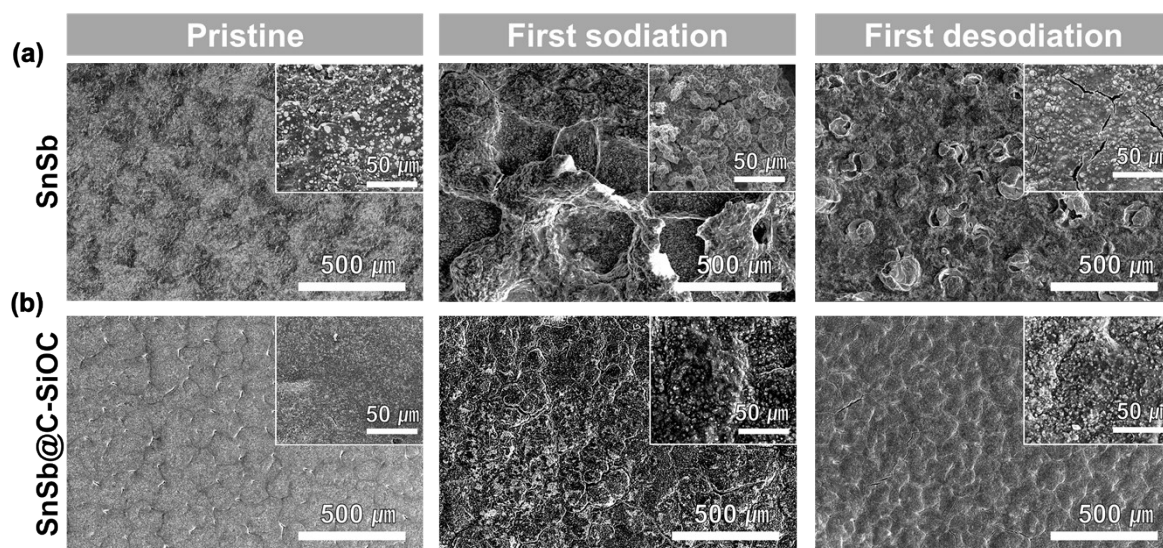

**Figure S11.** Top-view SEM images of the electrode surface. (a) SnSb and (b) SnSb@C-SiOC electrode in pristine, first sodiated, and first desodiated states.

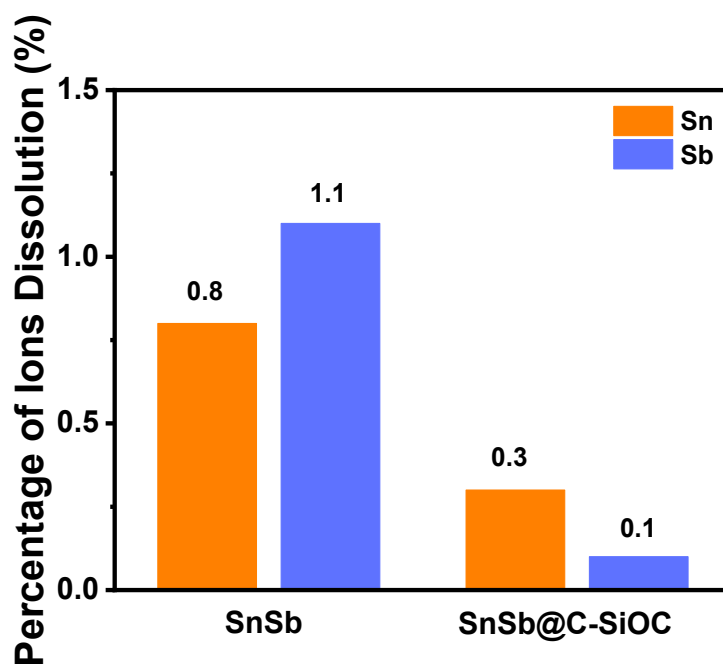

**Figure S12.** ICP-OES measurement of metal (Sn and Sb) dissolution from SnSb and SnSb@C-SiOC electrode after the 100<sup>th</sup> cycle at 2.0 A g<sup>-1</sup>.

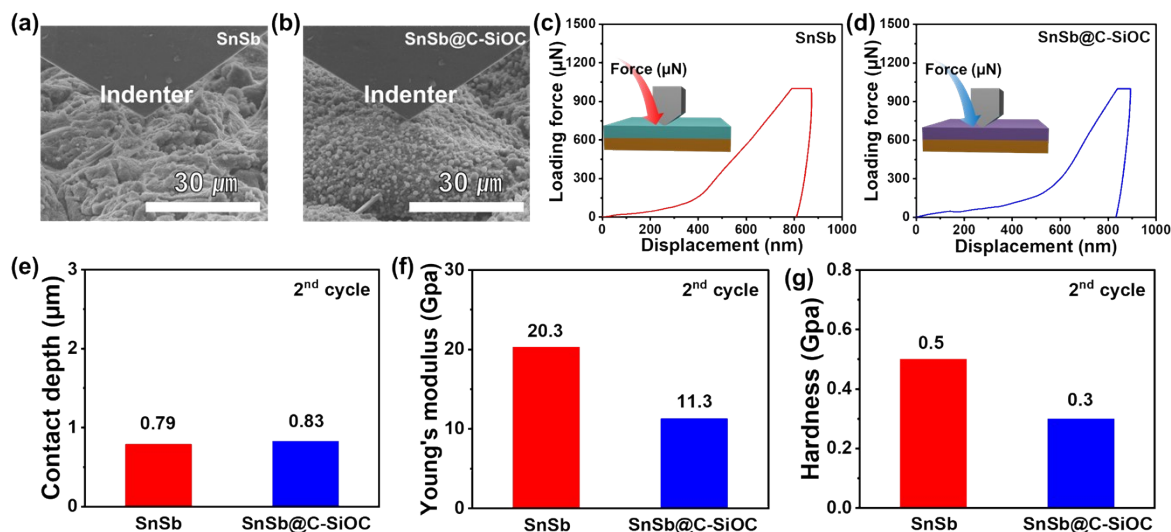

**Figure S13.** (a–b) Overview SEM images of nano-indentation analysis to obtain mechanical properties of the SnSb-based electrodes. (c–d) Loading force–displacement curves, (e) contact depth, (e) Young’s modulus, and (g) hardness of SnSb and SnSb@C-SiOC after the 2<sup>nd</sup> cycle.



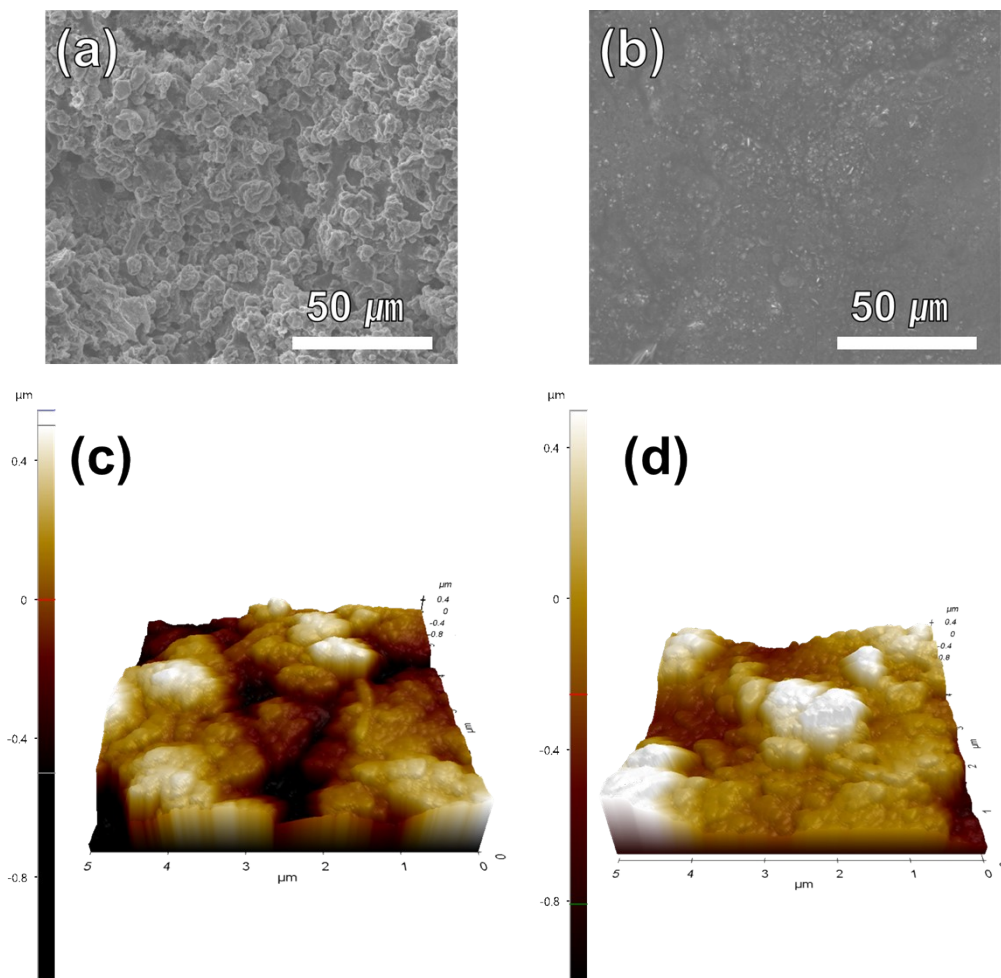

**Figure S14.** (a–b) Top-view SEM and (c-d) AFM topography images of SnSb and SnSb@C-SiOC electrode surface after the 100<sup>th</sup> cycle, respectively.

**Table S1.** BET surface area and porous characteristics of SiOC and SnSb@C-SiOC.

| Sample      | BET Surface Area (m <sup>2</sup> g <sup>-1</sup> ) | Total pore volume (cm <sup>3</sup> g <sup>-1</sup> ) |
|-------------|----------------------------------------------------|------------------------------------------------------|
| SiOC        | 175.3                                              | 0.27                                                 |
| SnSb@C-SiOC | 57.3                                               | 0.12                                                 |

**Table S2.** Fitted equivalent circuit values of SnSb and SnSb@C-SiOC electrodes using the Z-view program.

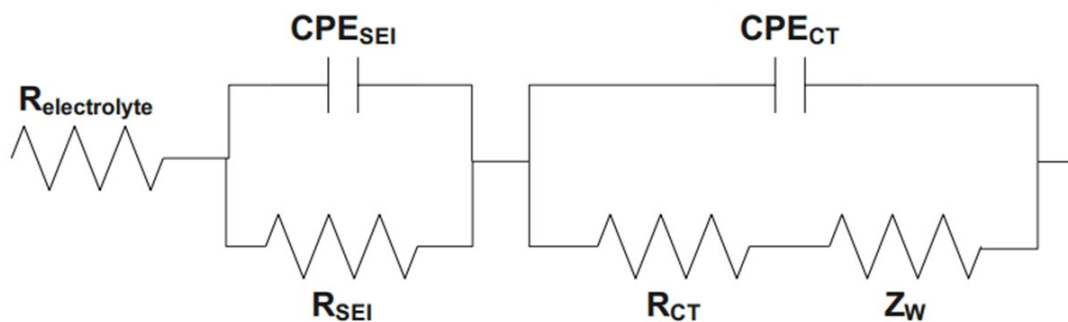

| Sample      | Component | Resistance ( $\Omega$ ) |                         |                         |
|-------------|-----------|-------------------------|-------------------------|-------------------------|
|             |           | Fresh electrode         | 100 <sup>th</sup> cycle | 250 <sup>th</sup> cycle |
| SnSb        | $R_{ele}$ | 2.3                     | 1.4                     | 5.4                     |
|             | $R_{SEI}$ | 464.5                   | 112.4                   | 150.5                   |
|             | $R_{ct}$  | 164.5                   | 15.4                    | 27.9                    |
| SnSb@C-SiOC | $R_{ele}$ | 6.6                     | 0.7                     | 0.3                     |
|             | $R_{SEI}$ | 125.0                   | 0.6                     | 0.4                     |
|             | $R_{ct}$  | 160.3                   | 1.6                     | 1.5                     |

**Table S3.** Summary of sodium storage performance of various SnSb-based anodes for SIBs.

| Active Material      | 1 <sup>st</sup> cycle capacity<br>(mAh g <sup>-1</sup> at mA g <sup>-1</sup> ) | 1 <sup>st</sup> Coulombic<br>efficiency (%) | Cycle performance<br>(mAh g <sup>-1</sup> at mA g <sup>-1</sup> ) | Cycle stability (%)                   | Reference |
|----------------------|--------------------------------------------------------------------------------|---------------------------------------------|-------------------------------------------------------------------|---------------------------------------|-----------|
| SnSb/CNT@GS          | 422 at 100                                                                     | 62.0                                        | 396 at 100                                                        | 77.0 at 100 <sup>th</sup> cycle       | 31        |
| B-SnSb/NCFs          | 831.8 at 100                                                                   | 72.9                                        | 486.9 at 100                                                      | 42.7 at 400 <sup>th</sup> cycle       | 23        |
| SnSb/C               | 490 at 50                                                                      | 75.3                                        | 265 at 100                                                        | 70.0 at 200 <sup>th</sup> cycle       | 38        |
| 3D SnSb@N-PG         | 500 at 100                                                                     | 50.4                                        | 400 at 100                                                        | 40.3 at 100 <sup>th</sup> cycle       | 13        |
| SnSb/N-PCNWs         | 517 at 50                                                                      | 68.7                                        | 180 at 2000                                                       | 100 at 10000 <sup>th</sup> cycle      | 11        |
| SnSb-G composite     | 455.6 at 200                                                                   | 76                                          | 281.8 at 2000                                                     | 89.1 at 1000 <sup>th</sup> cycle      | 26        |
| SnSb/C nanocomposite | 544 at 100                                                                     | 75.1                                        | 435 at 50                                                         | 80 at 50 <sup>th</sup> cycle          | 39        |
| SnSb@rGO@CNF         | 788.6 at 100                                                                   | 61.4                                        | 422.1 at 100                                                      | 87.2 at 200 <sup>th</sup> cycle       | 40        |
| <b>Our work</b>      | <b>543.0 at 100</b>                                                            | <b>84.3</b>                                 | <b>444.0 at 2000</b>                                              | <b>83.9 at 250<sup>th</sup> cycle</b> |           |
